# Supplementary material for: Experience: developing an inpatient malnutrition checklist for children 6 to 59 months to improve WHO protocol adherence and facilitate quality improvement in a low-resource setting
Source: PubMed Central journal article supplement (PMC6097458; doi:10.1080/16549716.2018.1503785), 2018-08-09
Supplement: ZGHA_A_1503785_SM9365.pdf [file ZGHA_A_1503785_SM9365.pdf]

Ideal Weight for Discharge\* (>-2 SD weight-for-height): \_\_\_\_\_

### TREATMENT FOR ACUTE MALNUTRITION

Name of child \_\_\_\_\_

Family name \_\_\_\_\_

Malnutrition classification:  Severe uncomplicated  Severe complicated \_\_\_\_\_  Moderate complicated \_\_\_\_\_

| PHYSICAL ASSESSMENT ON ADMISSION                                                                                                                                                                                                                                                                                                                                                       |                                                                                                                                                                 |                                                                                                                                                                                                                                                                                             |                                                                                                                             |
|----------------------------------------------------------------------------------------------------------------------------------------------------------------------------------------------------------------------------------------------------------------------------------------------------------------------------------------------------------------------------------------|-----------------------------------------------------------------------------------------------------------------------------------------------------------------|---------------------------------------------------------------------------------------------------------------------------------------------------------------------------------------------------------------------------------------------------------------------------------------------|-----------------------------------------------------------------------------------------------------------------------------|
| Day 1 (Admission):<br>(1) Child unconscious or lethargic <input type="checkbox"/> Yes <input type="checkbox"/> No<br>Child's hands are cold <input type="checkbox"/> Yes <input type="checkbox"/> No<br>Slow capillary refill >3sec OR weak/fast pulse <input type="checkbox"/> Yes <input type="checkbox"/> No<br><b>If yes to all three, doctor should begin treatment for SHOCK</b> | (2) Temperature: _____<br><input type="checkbox"/> Axillary <input type="checkbox"/> Rectal<br><b>If axillary &lt;35°C or rectal &lt;35.5°C keep child warm</b> | (3) Dehydration present: <input type="checkbox"/> Yes <input type="checkbox"/> No<br><b>Tolerating oral fluids <input type="checkbox"/> Yes <input type="checkbox"/> No</b><br>If YES to both, start oral rehydration; If dehydration present YES, but NO oral fluids, start IV rehydration | (4) Skin:<br><input type="checkbox"/> Dermatitis<br><input type="checkbox"/> Skin Lesion<br><input type="checkbox"/> Normal |

| LABS & SCREENING ON ADMISSION                                                                                                                                                                                                                                                                                                                       | MEDICATIONS/VITAMIN/MINERAL TREATMENTS                                                                                                                                                                                                                                                                                                                                          |
|-----------------------------------------------------------------------------------------------------------------------------------------------------------------------------------------------------------------------------------------------------------------------------------------------------------------------------------------------------|---------------------------------------------------------------------------------------------------------------------------------------------------------------------------------------------------------------------------------------------------------------------------------------------------------------------------------------------------------------------------------|
| (5) Blood sugar ordered? <input type="checkbox"/> Yes <b>Result:</b> _____ <input type="checkbox"/> Unable to test<br>*Treat if hypoglycemia present: <54mg/dl OR, unable to test<br><b>Treatment for hypoglycemia indicated <input type="checkbox"/> Yes <input type="checkbox"/> No</b>                                                           | (9) Vitamin A assessment<br>Does the child have Bitot's spots, corneal clouding, corneal ulceration? <input type="checkbox"/> Yes <input type="checkbox"/> No<br><br>Has the child had measles <3 months?<br><input type="checkbox"/> Yes <input type="checkbox"/> No<br><b>IF YES to either, vitamin A ordered</b><br><input type="checkbox"/> Yes <input type="checkbox"/> No |
| (6) Hemoglobin ordered? <input type="checkbox"/> Yes <b>Hemoglobin result:</b> _____<br>*Give blood transfusion if Hb <4 g/dl or 4-6 g/dl with respiratory distress<br><b>Transfusion indicated <input type="checkbox"/> Yes <input type="checkbox"/> No → If YES, transfusion ordered <input type="checkbox"/> Yes <input type="checkbox"/> No</b> |                                                                                                                                                                                                                                                                                                                                                                                 |
| (7) TB symptom screen <input type="checkbox"/> Negative <input type="checkbox"/> Positive <b>Symptoms:</b> _____<br>(8) HIV test done <input type="checkbox"/> Yes                                                                                                                                                                                  |                                                                                                                                                                                                                                                                                                                                                                                 |
| (10) Antibiotics: <b>Appropriate malnutrition antibiotics started</b><br><input type="checkbox"/> Yes<br><i>*see back for recommended empiric therapies</i>                                                                                                                                                                                         |                                                                                                                                                                                                                                                                                                                                                                                 |
| (11) Other vitamin/mineral supplements <b>only necessary</b> when premixed F-75/F-100 or RUTF <b>are not used</b> (except iron, see back form)                                                                                                                                                                                                      |                                                                                                                                                                                                                                                                                                                                                                                 |

**FEEDING DAYS 1-7: Start with feed every 2 hours, including overnight; gradually increase to every 4 hours**

**\*No pitting oedema/+1 pitting oedema: start 130 ml/kg/day \*+2 pitting oedema/+3 pitting oedema: start 100 ml/kg/day**

\*Increase volume/quantity to: 150 ml/kg (minimum) to 220 ml/kg (maximum) when appetite is good, reduced oedema, and no medical complications

|                            |                                        | 1           | 2           | 3 | 4 | 5 | 6 | 7 |
|----------------------------|----------------------------------------|-------------|-------------|---|---|---|---|---|
| DOCTOR/NUTRITIONIST/NURSE  | Date                                   |             |             |   |   |   |   |   |
|                            | Weight (kg)                            |             |             |   |   |   |   |   |
|                            | Height (cm)                            |             |             |   |   |   |   |   |
|                            | MUAC (mm)                              |             |             |   |   |   |   |   |
|                            | WFH/L (weight-for-height)              |             |             |   |   |   |   |   |
|                            | Estimated amount vomited               |             |             |   |   |   |   |   |
|                            | Pitting oedema (0, 1+, 2+, 3+)         |             |             |   |   |   |   |   |
|                            | Formula/RUTF                           |             |             |   |   |   |   |   |
|                            | Route of feeding                       |             |             |   |   |   |   |   |
|                            | ml/kg or kcal/kg provided              |             |             |   |   |   |   |   |
|                            | Total daily volume (ml)/amount         |             |             |   |   |   |   |   |
|                            | Volume (ml)/amount per feed            |             |             |   |   |   |   |   |
|                            | Frequency                              |             |             |   |   |   |   |   |
|                            | Antibiotics: ✓ if ordered              |             |             |   |   |   |   |   |
|                            | Vitamin A <b>*only if criteria met</b> | Dose given: | Dose given: |   |   |   |   |   |
| <b>Provider's initials</b> |                                        |             |             |   |   |   |   |   |

Ideal Weight for Discharge\* (>-2 SD weight-for-height): \_\_\_\_\_

**FEEDING DAYS 8-21: Feed every 4 hours, include night feedings**

**\*No pitting oedema/+1 pitting oedema: start 130 ml/kg/day \*+2 pitting oedema/+3 pitting oedema: start 100 ml/kg/day**

**\*Increase volume of feeds to: 150 ml/kg (minimum) to 220 ml/kg (maximum) when appetite is good, reduced oedema, and no medical complications**

|                           |                                | 8 | 9 | 10 | 11 | 12 | 13 | 14 | 15          | 16 | 17 | 18 | 19 | 20 | 21 |
|---------------------------|--------------------------------|---|---|----|----|----|----|----|-------------|----|----|----|----|----|----|
| DOCTOR/NUTRITIONIST/NURSE | Date                           |   |   |    |    |    |    |    |             |    |    |    |    |    |    |
|                           | Weight (kg)                    |   |   |    |    |    |    |    |             |    |    |    |    |    |    |
|                           | Is MUAC >115mm?                |   |   |    |    |    |    |    |             |    |    |    |    |    |    |
|                           | Is WFH/L >-2 SD?               |   |   |    |    |    |    |    |             |    |    |    |    |    |    |
|                           | Est. amount vomited            |   |   |    |    |    |    |    |             |    |    |    |    |    |    |
|                           | Oedema (0, 1+, 2+, 3+)         |   |   |    |    |    |    |    |             |    |    |    |    |    |    |
|                           | Formula/RUTF                   |   |   |    |    |    |    |    |             |    |    |    |    |    |    |
|                           | Route of feeding               |   |   |    |    |    |    |    |             |    |    |    |    |    |    |
|                           | ml/kg or kcal/kg provided      |   |   |    |    |    |    |    |             |    |    |    |    |    |    |
|                           | Total daily volume (ml)/amount |   |   |    |    |    |    |    |             |    |    |    |    |    |    |
|                           | Volume (ml)/amount per feed    |   |   |    |    |    |    |    |             |    |    |    |    |    |    |
|                           | Frequency                      |   |   |    |    |    |    |    |             |    |    |    |    |    |    |
|                           | Vitamin A: <b>if started</b>   |   |   |    |    |    |    |    | Dose given: |    |    |    |    |    |    |
|                           | Mebendazole: ✓ if given        |   |   |    |    |    |    |    |             |    |    |    |    |    |    |
|                           | Ferrous: ✓ when given Sulfate  |   |   |    |    |    |    |    |             |    |    |    |    |    |    |
| Provider's initials       |                                |   |   |    |    |    |    |    |             |    |    |    |    |    |    |

|                                                                                                                                                  |               |              |             |                                                                                                                      |                   |                    |                                                                                                                                                                                                                                                                                                                                                                                                                        |  |  |  |
|--------------------------------------------------------------------------------------------------------------------------------------------------|---------------|--------------|-------------|----------------------------------------------------------------------------------------------------------------------|-------------------|--------------------|------------------------------------------------------------------------------------------------------------------------------------------------------------------------------------------------------------------------------------------------------------------------------------------------------------------------------------------------------------------------------------------------------------------------|--|--|--|
| <b>MEBENDAZOLE:</b> Received in the last 6 months?<br><input type="checkbox"/> Yes <input type="checkbox"/> No → If <b>NO</b> , give Mebendazole |               |              |             | <b>VITAMIN A Dosing:</b> Give if Bitot's spots, corneal clouding, or corneal ulceration OR, recent measles <3 months |                   |                    | <b>RECOMMENDED ANTIBIOTIC TREATMENT</b><br><b>Empiric therapies for UNCOMPLICATED SAM</b><br>1. Amoxicillin x 5 days<br><b>Empiric therapies for COMPLICATED SAM/MAM</b><br>1. Ampicillin x 2 days, followed by Amoxicillin x 5 days; Also start <b>Gentamycin</b> x 7 days at the same time that Ampicillin is given<br>2. Ampicillin + Gentamycin x 7 days<br>3. Ceftriaxone x 7 days<br>4. Chloramphenicol x 7 days |  |  |  |
| <b>Dose:</b> 100 mg BID x 3 days<br><b>*Give only 7 days after admission</b>                                                                     |               |              |             | <b>Child's age</b>                                                                                                   | <b>Vit A oral</b> | <b>Vit A IM</b>    |                                                                                                                                                                                                                                                                                                                                                                                                                        |  |  |  |
| <b>FERROUS SULFATE:</b> Give only when stable, gaining weight and in transition phase                                                            |               |              |             | <6 months                                                                                                            | 50,000 IU         | 50,000 IU          |                                                                                                                                                                                                                                                                                                                                                                                                                        |  |  |  |
|                                                                                                                                                  |               |              |             | 6-12 months                                                                                                          | 100,000 IU        | 100,000 IU         |                                                                                                                                                                                                                                                                                                                                                                                                                        |  |  |  |
|                                                                                                                                                  |               |              |             | >12 months                                                                                                           | 200,000 IU        | 100,000 IU         |                                                                                                                                                                                                                                                                                                                                                                                                                        |  |  |  |
| <b>Weight</b>                                                                                                                                    | <b>Tablet</b> | <b>Syrup</b> | <b>Dose</b> | <b>ReSoMal dosing loose stools:</b> If +oedema 30 ml after each loose stool                                          |                   | <b>Child's Age</b> | <b>Volume to give after each loose stool</b>                                                                                                                                                                                                                                                                                                                                                                           |  |  |  |
| 3-6 kg                                                                                                                                           | 1/6 Tablet    | 0.5 ml       | 10 mg       |                                                                                                                      |                   | <2 years           | 50 – 100 ml                                                                                                                                                                                                                                                                                                                                                                                                            |  |  |  |
| 6-10 kg                                                                                                                                          | ¼ Tablet      | 0.75 ml      | 15 mg       |                                                                                                                      |                   | ≥ 2 years          | 100 – 200 ml                                                                                                                                                                                                                                                                                                                                                                                                           |  |  |  |
| 10-15 kg                                                                                                                                         | ¼ Tablet      | 1 ml         | 20 mg       |                                                                                                                      |                   |                    |                                                                                                                                                                                                                                                                                                                                                                                                                        |  |  |  |

|                      |                                                                                                                                                                    |                                     |                                                                             |                                    |                                                                                                                                                                           |                                                                                                                                                                                                                                                                                                                                                                                                                                                                                                                                                              |
|----------------------|--------------------------------------------------------------------------------------------------------------------------------------------------------------------|-------------------------------------|-----------------------------------------------------------------------------|------------------------------------|---------------------------------------------------------------------------------------------------------------------------------------------------------------------------|--------------------------------------------------------------------------------------------------------------------------------------------------------------------------------------------------------------------------------------------------------------------------------------------------------------------------------------------------------------------------------------------------------------------------------------------------------------------------------------------------------------------------------------------------------------|
| <b>All patients:</b> | <input checked="" type="checkbox"/> Does the child have a good appetite?<br><input checked="" type="checkbox"/> Are all medical complications and oedema resolved? | <b>If outpatient rehabilitation</b> | <input checked="" type="checkbox"/> Did child consume 2 full meals of RUTF? | <b>If inpatient rehabilitation</b> | <input checked="" type="checkbox"/> Is the MUAC >115 mm?<br><input checked="" type="checkbox"/> Is the WFH/L >-2 SD x 2 consecutive days? Is child at their ideal weight? | <b>DISCHARGE EDUCATION:</b><br><input type="checkbox"/> Counsel caregiver on good nutrition and cooking practices<br><input type="checkbox"/> Instruct caregiver to immediately go to nearest health facility if child refuses to eat or has danger signs<br><input type="checkbox"/> Instruct caregiver to follow-up in health center for admission to outpatient program<br><input type="checkbox"/> Counter referral to health center<br><input type="checkbox"/> If patient is receiving RUTF, give gap supply and contact health center to ensure stock |
|                      | <b>DISCHARGE: If answered yes to all questions, child may be ready for discharge</b>                                                                               |                                     |                                                                             |                                    |                                                                                                                                                                           |                                                                                                                                                                                                                                                                                                                                                                                                                                                                                                                                                              |
